# Supplementary material for: Evaluation of Rare and Common Variants from Suspected Familial or Sporadic Nasopharyngeal Carcinoma (NPC) Susceptibility Genes in Sporadic NPC
Source: Oxford University Press journal article supplement (doi:10.1158/1055-9965.epi-19-0007), 2019-07-03
Supplement: 10559965epi190007-sup-214687_3_supp_5587549_pt3lqc.xlsx [file 10559965epi190007-sup-214687_3_supp_5587549_pt3lqc.xlsx]

## Sheet: Sheet1
Supplementary Table 3. Common variants (MAF ≥1%) among previously reported genes from a multiplex family study in Taiwan.
Chr.	Gene	SNP	Position (bp)	REF	EFFECT	MAF	MAF_Control	MAF_Case	OR	95% CI	P_additive	Func_refGene	ExonicFunc_refGene	AAChange_refGene
6	BRD2	rs145364886	32946979	C	T	0.098	0.082	0.117	1.48	1.18-1.86	0.00064	intronic	#N/A	#N/A
6	BRD2	rs2066751	32948287	T	G	0.099	0.083	0.118	1.47	1.18-1.84	0.00069	intronic	#N/A	#N/A
6	BRD2	rs2066753	32948288	T	C	0.099	0.083	0.118	1.47	1.18-1.84	0.00069	intronic	#N/A	#N/A
6	BRD2	rs17220479	32940815	C	T	0.099	0.083	0.118	1.46	1.17-1.83	0.00081	intronic	#N/A	#N/A
6	BRD2	rs2066752	32948296	G	C	0.177	0.163	0.193	1.22	1.03-1.45	0.02423	intronic	#N/A	#N/A
9	NOTCH1	rs3125000	139403268	T	C	0.088	0.077	0.099	1.31	1.03-1.66	0.0274	intronic	#N/A	#N/A
9	NOTCH1	rs3812603	139402908	T	C	0.088	0.078	0.099	1.31	1.03-1.66	0.02755	intronic	#N/A	#N/A
9	NOTCH1	rs3124597	139402663	T	C	0.087	0.077	0.099	1.31	1.03-1.66	0.02764	intronic	#N/A	#N/A
12	RAPGEF3	rs1018939	48145104	G	A	0.399	0.415	0.38	0.86	0.75-0.99	0.03229	intronic	#N/A	#N/A
1	PSEN2	rs2802267	227078955	T	C	0.435	0.419	0.454	1.15	1.01-1.32	0.03628	intronic	#N/A	#N/A
12	RAPGEF3	12:48142470_C/T	48142470	C	T	0.054	0.055	0.053	0.69	0.47-0.99	0.04673	intronic	#N/A	#N/A
8	PRKDC	rs8178245	48691637	G	A	0.025	0.029	0.02	0.66	0.42-1.02	0.06489	exonic	unknown	UNKNOWN
6	BRD2	rs3918140	32948462	G	A	0.203	0.191	0.216	1.17	0.99-1.37	0.06496	exonic	synonymous SNV	BRD2:NM_001199456:exon12:c.G2232A:p.S744S;BRD2:NM_001113182:exon13:c.G2373A:p.S791S;BRD2:NM_001199455:exon13:c.G2478A:p.S826S;BRD2:NM_005104:exon13:c.G2373A:p.S791S;BRD2:NM_001291986:exon14:c.G2013A:p.S671S
1	LAMC2	rs76480542	183206398	A	G	0.077	0.07	0.085	1.26	0.98-1.63	0.07488	intronic	#N/A	#N/A
9	NOTCH1	rs10521	139397707	G	A	0.096	0.088	0.106	1.23	0.98-1.54	0.07827	exonic	synonymous SNV	NOTCH1:NM_017617:exon27:c.C5094T:p.D1698D
6	BRD2	rs2071876	32948426	C	T	0.018	0.021	0.013	0.62	0.36-1.05	0.07993	exonic	synonymous SNV	BRD2:NM_001199456:exon12:c.C2196T:p.S732S;BRD2:NM_001113182:exon13:c.C2337T:p.S779S;BRD2:NM_001199455:exon13:c.C2442T:p.S814S;BRD2:NM_005104:exon13:c.C2337T:p.S779S;BRD2:NM_001291986:exon14:c.C1977T:p.S659S
9	NOTCH1	rs3829116	139401577	C	G	0.094	0.086	0.104	1.22	0.97-1.54	0.08318	intronic	#N/A	#N/A
9	NOTCH1	rs3124999	139395473	C	T	0.096	0.088	0.106	1.22	0.97-1.53	0.08542	intronic	#N/A	#N/A
19	DLL3	rs2304222	39991203	A	G	0.055	0.06	0.048	0.77	0.57-1.04	0.0873	intronic	#N/A	#N/A
12	RAPGEF3	rs2074533	48134695	T	C	0.457	0.471	0.441	0.89	0.77-1.02	0.08855	intronic	#N/A	#N/A
9	NOTCH1	rs2229974	139391636	G	A	0.04	0.034	0.046	1.33	0.95-1.88	0.09746	exonic	synonymous SNV	NOTCH1:NM_017617:exon34:c.C6555T:p.D2185D
8	PRKDC	rs55769154	48694956	A	G	0.026	0.022	0.031	1.42	0.93-2.19	0.10173	exonic	unknown	UNKNOWN
7	LFNG	rs200232463	2566458	C	T	0.013	0.016	0.01	0.61	0.32-1.12	0.11755	intronic	#N/A	#N/A
3	MLH1	rs2286939	37062040	T	C	0.049	0.044	0.055	1.26	0.93-1.73	0.13838	intronic	#N/A	#N/A
1	LAMC2	rs3738823	183205480	C	T	0.179	0.188	0.168	0.88	0.73-1.04	0.14036	intronic	#N/A	#N/A
3	MLH1	rs4234259	37048633	A	G	0.049	0.044	0.055	1.26	0.93-1.72	0.14156	intronic	#N/A	#N/A
3	MLH1	rs9876116	37083740	A	G	0.049	0.044	0.055	1.26	0.92-1.72	0.14651	intronic	#N/A	#N/A
1	LAMC2	rs3738824	183192496	A	G	0.178	0.187	0.167	0.88	0.73-1.05	0.14829	intronic	#N/A	#N/A
9	NOTCH1	rs3124594	139396408	A	G	0.068	0.062	0.075	1.21	0.93-1.57	0.15429	intronic	#N/A	#N/A
1	PSEN2	rs10753428	227081622	A	G	0.481	0.491	0.47	0.91	0.8-1.04	0.16334	intronic	#N/A	#N/A
1	PSEN2	rs75733498	227077809	C	T	0.082	0.089	0.074	0.84	0.66-1.07	0.16664	exonic	synonymous SNV	PSEN2:NM_000447:exon9:c.C861T:p.P287P;PSEN2:NM_012486:exon9:c.C861T:p.P287P
12	RAPGEF3	rs11168230	48151822	C	G	0.195	0.204	0.184	0.89	0.75-1.05	0.16706	exonic	nonsynonymous SNV	RAPGEF3:NM_001098531:exon2:c.G46C:p.A16P
3	MLH1	rs11129748	37067050	A	G	0.049	0.045	0.054	1.24	0.91-1.69	0.17016	intronic	#N/A	#N/A
1	HNRNPU	rs9730334	245021132	C	G	0.013	0.01	0.016	1.51	0.84-2.77	0.17022	intronic	#N/A	#N/A
12	RAPGEF3	rs56199059	48141798	T	C	0.382	0.371	0.395	1.1	0.96-1.27	0.17669	intronic	#N/A	#N/A
12	RAPGEF3	rs73304406	48140827	A	C	0.131	0.139	0.122	0.87	0.72-1.06	0.18236	intronic	#N/A	#N/A
8	PRKDC	rs8178111	48792042	A	T	0.016	0.018	0.013	0.69	0.39-1.19	0.18786	intronic	#N/A	#N/A
9	NOTCH1	rs61751550	139405199	T	A	0.023	0.026	0.019	0.73	0.46-1.16	0.19414	exonic	synonymous SNV	NOTCH1:NM_017617:exon17:c.A2646T:p.A882A
19	DLL3	rs2304214	39996027	C	T	0.112	0.118	0.105	0.87	0.71-1.08	0.2048	exonic	synonymous SNV	DLL3:NM_016941:exon6:c.C1029T:p.P343P;DLL3:NM_203486:exon6:c.C1029T:p.P343P
3	MLH1	rs2241031	37090274	C	T	0.048	0.044	0.053	1.22	0.89-1.68	0.21005	intronic	#N/A	#N/A
9	NOTCH1	rs9411206	139405501	A	G	0.096	0.089	0.102	1.16	0.92-1.45	0.21181	intronic	#N/A	#N/A
1	LAMC2	rs2296303	183201970	G	C	0.18	0.188	0.171	0.9	0.75-1.07	0.2173	exonic	nonsynonymous SNV	LAMC2:NM_005562:exon14:c.G2198C:p.S733T;LAMC2:NM_018891:exon14:c.G2198C:p.S733T
5	MAML1	rs3797776	179193598	C	T	0.146	0.139	0.154	1.12	0.93-1.36	0.23001	exonic	synonymous SNV	MAML1:NM_014757:exon2:c.C1587T:p.S529S
19	DLL3	rs8107127	39993560	T	G	0.112	0.118	0.106	0.88	0.71-1.09	0.24135	exonic	nonsynonymous SNV	DLL3:NM_016941:exon4:c.T515G:p.F172C;DLL3:NM_203486:exon4:c.T515G:p.F172C
8	PRKDC	rs8178235	48697705	C	T	0.032	0.035	0.028	0.79	0.53-1.17	0.24219	exonic	unknown	UNKNOWN
19	DLL3	rs8106337	39993591	C	G	0.112	0.118	0.106	0.88	0.71-1.09	0.24257	exonic	synonymous SNV	DLL3:NM_016941:exon4:c.C546G:p.A182A;DLL3:NM_203486:exon4:c.C546G:p.A182A
9	NOTCH1	rs3812596	139391543	C	T	0.052	0.048	0.057	1.2	0.88-1.62	0.24453	exonic	synonymous SNV	NOTCH1:NM_017617:exon34:c.G6648A:p.P2216P
6	BRD2	rs206781	32946133	T	C	0.168	0.175	0.16	0.9	0.75-1.08	0.24627	exonic	synonymous SNV	BRD2:NM_001199455:exon9:c.T1809C:p.S603S;BRD2:NM_001199456:exon9:c.T1668C:p.S556S;BRD2:NM_001113182:exon10:c.T1809C:p.S603S;BRD2:NM_005104:exon10:c.T1809C:p.S603S;BRD2:NM_001291986:exon11:c.T1449C:p.S483S
7	LFNG	rs893240	2565283	C	T	0.119	0.125	0.111	0.88	0.72-1.09	0.24808	intronic	#N/A	#N/A
3	MLH1	rs1799977	37053568	A	G	0.02	0.017	0.023	1.33	0.82-2.18	0.24925	exonic	nonsynonymous SNV	MLH1:NM_000249:exon8:c.A655G:p.I219V;MLH1:NM_001167617:exon8:c.A361G:p.I121V;MLH1:NM_001258271:exon8:c.A655G:p.I219V
22	MFNG	rs2071840	37881842	G	A	0.262	0.27	0.252	0.91	0.79-1.06	0.24977	intronic	#N/A	#N/A
1	HNRNPU	rs12124462	245025692	A	T	0.013	0.011	0.015	1.4	0.78-2.56	0.25628	intronic	#N/A	#N/A
1	HNRNPU	rs6675421	245027349	C	T	0.202	0.193	0.212	1.1	0.93-1.3	0.25863	exonic	synonymous SNV	HNRNPU:NM_004501:exon1:c.G261A:p.E87E;HNRNPU:NM_031844:exon1:c.G261A:p.E87E
1	LAMC2	rs3738822	183205569	C	T	0.035	0.032	0.039	1.23	0.86-1.79	0.2597	intronic	#N/A	#N/A
6	BRD2	rs11908	32944746	G	A	0.168	0.175	0.16	0.9	0.75-1.08	0.26231	intronic	#N/A	#N/A
18	NEDD4L	rs2288775	55983364	A	G	0.287	0.295	0.278	0.92	0.8-1.07	0.27516	intronic	#N/A	#N/A
6	BRD2	rs485502	32943345	C	T	0.336	0.345	0.326	0.93	0.8-1.06	0.27528	intronic	#N/A	#N/A
5	MAML1	rs6895902	179201847	G	A	0.147	0.142	0.154	1.11	0.92-1.34	0.28304	exonic	nonsynonymous SNV	MAML1:NM_014757:exon5:c.G3020A:p.S1007N
8	PRKDC	rs56174867	48870030	A	T	0.025	0.022	0.028	1.26	0.82-1.95	0.29148	intronic	#N/A	#N/A
12	RAPGEF3	rs116937941	48141456	C	T	0.024	0.026	0.022	0.79	0.5-1.23	0.29352	intronic	#N/A	#N/A
6	BRD2	rs206778	32946964	G	A	0.153	0.159	0.146	0.9	0.75-1.09	0.29868	exonic	nonsynonymous SNV	BRD2:NM_001199455:exon10:c.G1939A:p.D647N
18	NEDD4L	rs2288774	55983330	T	C	0.373	0.381	0.363	0.93	0.81-1.07	0.30586	intronic	#N/A	#N/A
18	NEDD4L	rs77078423	56037738	A	G	0.024	0.022	0.027	1.25	0.81-1.95	0.31321	intronic	#N/A	#N/A
12	RAPGEF3	rs12422983	48142636	C	T	0.042	0.038	0.045	1.18	0.85-1.65	0.31847	exonic	nonsynonymous SNV	RAPGEF3:NM_001098532:exon10:c.G994A:p.G332S;RAPGEF3:NM_001098531:exon11:c.G1120A:p.G374S;RAPGEF3:NM_006105:exon11:c.G994A:p.G332S
18	NEDD4L	rs145576341	56032990	C	T	0.036	0.038	0.032	0.83	0.57-1.2	0.32938	intronic	#N/A	#N/A
9	NOTCH1	rs3124593	139393175	A	G	0.062	0.057	0.068	1.16	0.86-1.56	0.33775	intronic	#N/A	#N/A
3	MLH1	rs63750114	37090506	C	A	0.011	0.012	0.009	0.73	0.37-1.38	0.34013	exonic	nonsynonymous SNV	MLH1:NM_001167619:exon17:c.C1378A:p.Q460K;MLH1:NM_001258273:exon17:c.C1378A:p.Q460K;MLH1:NM_000249:exon18:c.C2101A:p.Q701K;MLH1:NM_001167617:exon18:c.C1807A:p.Q603K;MLH1:NM_001167618:exon18:c.C1378A:p.Q460K;MLH1:NM_001258274:exon19:c.C1378A:p.Q460K
9	NOTCH1	rs2229971	139407932	A	G	0.188	0.182	0.195	1.08	0.91-1.29	0.3552	exonic	synonymous SNV	NOTCH1:NM_017617:exon14:c.T2265C:p.N755N
6	BRD2	rs186277039	32944037	C	T	0.018	0.02	0.016	0.79	0.47-1.3	0.35972	exonic	synonymous SNV	BRD2:NM_001199455:exon5:c.C621T:p.G207G;BRD2:NM_001199456:exon5:c.C480T:p.G160G;BRD2:NM_001113182:exon6:c.C621T:p.G207G;BRD2:NM_005104:exon6:c.C621T:p.G207G;BRD2:NM_001291986:exon7:c.C261T:p.G87G
7	LFNG	rs115380608	2552381	G	A	0.039	0.037	0.042	1.17	0.83-1.65	0.36114	intronic	#N/A	#N/A
12	RAPGEF3	rs12424297	48142343	T	C	0.041	0.039	0.045	1.17	0.84-1.63	0.36158	intronic	#N/A	#N/A
12	RAPGEF3	rs190509176	48142514	G	A	0.019	0.017	0.021	1.26	0.76-2.08	0.36935	intronic	#N/A	#N/A
1	LAMC2	rs647347	183177218	A	G	0.44	0.447	0.433	0.94	0.82-1.08	0.37855	intronic	#N/A	#N/A
1	LAMC2	rs2296306	183191324	C	A	0.074	0.071	0.078	1.12	0.87-1.44	0.37883	exonic	nonsynonymous SNV	LAMC2:NM_005562:exon6:c.C741A:p.D247E;LAMC2:NM_018891:exon6:c.C741A:p.D247E
1	LAMC2	rs2296305	183191367	C	T	0.074	0.071	0.078	1.12	0.87-1.44	0.37883	intronic	#N/A	#N/A
12	RAPGEF3	rs10875688	48134360	G	T	0.273	0.279	0.266	0.93	0.8-1.09	0.38014	intronic	#N/A	#N/A
18	NEDD4L	rs4149601	55816791	G	A	0.221	0.215	0.228	1.07	0.91-1.26	0.38852	exonic	synonymous SNV	NEDD4L:NM_001144968:exon1:c.G24A:p.Q8Q;NEDD4L:NM_001144969:exon1:c.G24A:p.Q8Q
7	LFNG	rs62444250	2564849	A	G	0.024	0.026	0.023	0.83	0.53-1.29	0.41567	intronic	#N/A	#N/A
1	PSEN2	rs117724727	227071285	G	A	0.064	0.068	0.06	0.9	0.68-1.17	0.42831	intronic	#N/A	#N/A
12	RAPGEF3	rs10875686	48132714	G	A	0.271	0.276	0.264	0.94	0.81-1.1	0.43607	intronic	#N/A	#N/A
1	LAMC2	rs74971603	183187715	G	A	0.036	0.034	0.038	1.16	0.8-1.67	0.43816	intronic	#N/A	#N/A
7	LFNG	rs117649295	2568602	G	A	0.038	0.041	0.036	0.87	0.61-1.23	0.43972	UTR3	#N/A	#N/A
12	RAPGEF3	rs2072116	48132451	T	C	0.01	0.012	0.009	0.77	0.38-1.5	0.44348	intronic	#N/A	#N/A
3	MLH1	rs63750447	37067240	T	A	0.034	0.032	0.036	1.15	0.8-1.66	0.45362	exonic	nonsynonymous SNV	MLH1:NM_001167619:exon11:c.T428A:p.V143D;MLH1:NM_001258273:exon11:c.T428A:p.V143D;MLH1:NM_000249:exon12:c.T1151A:p.V384D;MLH1:NM_001167617:exon12:c.T857A:p.V286D;MLH1:NM_001167618:exon12:c.T428A:p.V143D;MLH1:NM_001258271:exon12:c.T1151A:p.V384D;MLH1:NM_001258274:exon13:c.T428A:p.V143D
19	BCL2L12	rs881785	50173291	C	G	0.201	0.205	0.196	0.94	0.79-1.11	0.46026	intronic	#N/A	#N/A
2	ITGB6	rs2124971	161051853	A	G	0.484	0.478	0.491	1.05	0.92-1.2	0.46103	intronic	#N/A	#N/A
2	ITGB6	rs7608557	161025685	A	G	0.483	0.477	0.49	1.05	0.92-1.2	0.46692	intronic	#N/A	#N/A
2	ITGB6	rs76007773	160994764	A	G	0.299	0.294	0.305	1.06	0.91-1.22	0.46708	intronic	#N/A	#N/A
12	RAPGEF3	rs757279	48144243	A	C	0.035	0.037	0.032	0.87	0.6-1.26	0.47297	intronic	#N/A	#N/A
2	ITGB6	rs1037694	161028992	T	C	0.218	0.222	0.213	0.94	0.8-1.11	0.47914	intronic	#N/A	#N/A
1	LAMC2	rs77922049	183177270	G	A	0.014	0.015	0.013	0.81	0.45-1.44	0.4813	intronic	#N/A	#N/A
1	LAMC2	rs12037099	183187527	A	T	0.051	0.048	0.054	1.11	0.82-1.5	0.48437	exonic	nonsynonymous SNV	LAMC2:NM_005562:exon4:c.A407T:p.D136V;LAMC2:NM_018891:exon4:c.A407T:p.D136V
18	NEDD4L	rs2277718	56056502	G	A	0.031	0.029	0.033	1.14	0.77-1.69	0.50001	intronic	#N/A	#N/A
8	PRKDC	rs78010936	48793925	T	C	0.014	0.013	0.016	1.2	0.69-2.11	0.51281	intronic	#N/A	#N/A
12	RAPGEF3	rs757281	48142418	C	G	0.034	0.036	0.032	0.89	0.61-1.28	0.52412	intronic	#N/A	#N/A
1	LAMC2	rs3818420	183203412	T	A	0.051	0.049	0.054	1.1	0.81-1.48	0.54113	intronic	#N/A	#N/A
6	BRD2	rs1063379	32946034	T	C	0.078	0.08	0.075	0.93	0.72-1.19	0.54289	exonic	synonymous SNV	BRD2:NM_001199455:exon9:c.T1710C:p.D570D;BRD2:NM_001199456:exon9:c.T1569C:p.D523D;BRD2:NM_001113182:exon10:c.T1710C:p.D570D;BRD2:NM_005104:exon10:c.T1710C:p.D570D;BRD2:NM_001291986:exon11:c.T1350C:p.D450D
6	BRD2	rs115403773	32948031	G	A	0.078	0.08	0.075	0.93	0.72-1.19	0.54289	intronic	#N/A	#N/A
2	ITGB6	rs16844790	160968628	A	G	0.169	0.165	0.173	1.06	0.88-1.27	0.54448	exonic	synonymous SNV	ITGB6:NM_001282354:exon11:c.T1779C:p.N593N;ITGB6:NM_001282355:exon11:c.T1743C:p.N581N;ITGB6:NM_001282388:exon12:c.T1938C:p.N646N;ITGB6:NM_001282390:exon12:c.T1650C:p.N550N;ITGB6:NM_000888:exon13:c.T2064C:p.N688N;ITGB6:NM_001282389:exon13:c.T1845C:p.N615N;ITGB6:NM_001282353:exon14:c.T2064C:p.N688N
8	PRKDC	rs55960960	48810975	T	C	0.03	0.032	0.028	0.89	0.6-1.31	0.55488	intronic	#N/A	#N/A
2	ITGB6	rs1156821	160994348	C	T	0.27	0.265	0.275	1.04	0.9-1.21	0.58908	exonic	synonymous SNV	ITGB6:NM_001282354:exon8:c.G972A:p.V324V;ITGB6:NM_001282388:exon9:c.G1131A:p.V377V;ITGB6:NM_001282390:exon9:c.G843A:p.V281V;ITGB6:NM_000888:exon10:c.G1257A:p.V419V;ITGB6:NM_001282355:exon10:c.G1257A:p.V419V;ITGB6:NM_001282389:exon10:c.G1038A:p.V346V;ITGB6:NM_001282353:exon11:c.G1257A:p.V419V
12	RAPGEF3	rs4141223	48145456	G	A	0.034	0.036	0.032	0.9	0.62-1.31	0.58909	intronic	#N/A	#N/A
6	BRD2	rs3918154	32943752	A	G	0.011	0.012	0.01	0.84	0.44-1.59	0.60224	intronic	#N/A	#N/A
7	LFNG	rs61743870	2566484	C	T	0.141	0.143	0.139	0.95	0.79-1.16	0.6307	exonic	synonymous SNV	LFNG:NM_001040167:exon7:c.C1002T:p.Y334Y;LFNG:NM_001040168:exon7:c.C1002T:p.Y334Y;LFNG:NM_001166355:exon8:c.C789T:p.Y263Y;LFNG:NM_002304:exon8:c.C615T:p.Y205Y
9	NOTCH1	rs139994842	139402760	G	A	0.019	0.021	0.018	0.89	0.54-1.45	0.6389	exonic	synonymous SNV	NOTCH1:NM_017617:exon20:c.C3249T:p.C1083C
1	HNRNPU	1:245021031_A/G	245021031	A	G	0.055	0.058	0.051	0.93	0.68-1.27	0.64101	intronic	#N/A	#N/A
9	NOTCH1	rs2229975	139413908	C	T	0.06	0.061	0.058	0.94	0.71-1.24	0.65713	exonic	synonymous SNV	NOTCH1:NM_017617:exon5:c.G852A:p.P284P
9	NOTCH1	rs4880099	139410589	A	G	0.12	0.119	0.122	1.05	0.85-1.29	0.664	intronic	#N/A	#N/A
1	HNRNPU	rs141976695	245019660	G	C	0.016	0.015	0.017	1.13	0.65-1.94	0.66628	intronic	#N/A	#N/A
1	LAMC2	rs3768593	183212548	T	G	0.367	0.37	0.363	0.97	0.84-1.12	0.69113	UTR3	#N/A	#N/A
6	BRD2	rs56088723	32943142	C	G	0.023	0.022	0.024	1.09	0.71-1.67	0.69143	intronic	#N/A	#N/A
1	PSEN2	rs1046240	227071525	C	T	0.392	0.389	0.396	1.03	0.89-1.18	0.70656	exonic	synonymous SNV	PSEN2:NM_000447:exon5:c.C261T:p.H87H;PSEN2:NM_012486:exon5:c.C261T:p.H87H
6	BRD2	rs578119015	32940808	G	C	0.026	0.027	0.025	0.93	0.62-1.39	0.73317	intronic	#N/A	#N/A
18	NEDD4L	rs117507363	56024582	C	T	0.052	0.053	0.051	0.95	0.7-1.28	0.73612	intronic	#N/A	#N/A
1	PSEN2	rs6759	227069737	C	T	0.393	0.39	0.396	1.02	0.89-1.18	0.74316	exonic	synonymous SNV	PSEN2:NM_000447:exon4:c.C129T:p.N43N;PSEN2:NM_012486:exon4:c.C129T:p.N43N
8	PRKDC	rs8178016	48852328	C	T	0.067	0.066	0.069	1.05	0.8-1.37	0.74795	intronic	#N/A	#N/A
1	LAMC2	rs79397457	183190168	T	C	0.075	0.076	0.074	0.96	0.74-1.24	0.75747	intronic	#N/A	#N/A
18	NEDD4L	rs140550335	55998093	A	C	0.011	0.011	0.01	0.91	0.47-1.73	0.76472	exonic	synonymous SNV	NEDD4L:NM_001144966:exon10:c.A574C:p.R192R;NEDD4L:NM_001144970:exon10:c.A574C:p.R192R;NEDD4L:NM_001144964:exon11:c.A574C:p.R192R;NEDD4L:NM_001144965:exon11:c.A574C:p.R192R;NEDD4L:NM_001144967:exon11:c.A937C:p.R313R;NEDD4L:NM_001144968:exon11:c.A913C:p.R305R;NEDD4L:NM_001144969:exon11:c.A913C:p.R305R;NEDD4L:NM_001243960:exon11:c.A937C:p.R313R;NEDD4L:NM_015277:exon11:c.A937C:p.R313R;NEDD4L:NM_00114…
5	MAML1	rs75704521	179201888	T	G	0.157	0.155	0.16	1.03	0.85-1.24	0.76547	UTR3	#N/A	#N/A
9	NOTCH1	rs9411208	139412197	G	A	0.084	0.083	0.085	1.03	0.81-1.32	0.78653	intronic	#N/A	#N/A
9	NOTCH1	rs3125003	139405475	C	T	0.367	0.366	0.367	1.02	0.89-1.17	0.79551	intronic	#N/A	#N/A
18	NEDD4L	rs4149609	56008148	A	G	0.338	0.34	0.336	0.98	0.85-1.13	0.79697	intronic	#N/A	#N/A
8	PRKDC	rs7830743	48710955	A	G	0.066	0.065	0.067	1.04	0.79-1.36	0.80123	exonic	unknown	UNKNOWN
2	ITGB6	rs188990572	161056531	C	T	0.015	0.014	0.016	1.07	0.62-1.85	0.80229	exonic	nonsynonymous SNV	ITGB6:NM_000888:exon1:c.G44A:p.R15K;ITGB6:NM_001282354:exon1:c.G44A:p.R15K;ITGB6:NM_001282355:exon1:c.G44A:p.R15K;ITGB6:NM_001282353:exon2:c.G44A:p.R15K
7	LFNG	rs187443334	2552825	G	A	0.012	0.013	0.012	0.93	0.51-1.67	0.80776	exonic	nonsynonymous SNV	LFNG:NM_001166355:exon2:c.G82A:p.G28R
1	LAMC2	1:183205374_G/A	183205374	G	A	0.054	0.056	0.051	0.96	0.7-1.32	0.81352	intronic	#N/A	#N/A
1	LAMC2	rs2296304	183201739	A	G	0.032	0.032	0.032	1.04	0.7-1.53	0.84709	intronic	#N/A	#N/A
22	MFNG	rs2071841	37870771	G	A	0.141	0.14	0.142	1.02	0.84-1.23	0.86926	intronic	#N/A	#N/A
8	PRKDC	rs10097783	48805582	G	A	0.148	0.147	0.149	1.01	0.84-1.22	0.87967	intronic	#N/A	#N/A
3	MLH1	rs41562513	37070437	G	A	0.017	0.017	0.018	1.04	0.61-1.74	0.8908	intronic	#N/A	#N/A
6	BRD2	rs147269908	32948577	G	C	0.029	0.028	0.029	1.03	0.7-1.51	0.89431	UTR3	#N/A	#N/A
1	LAMC2	1:183189923_A/T	183189923	A	T	0.054	0.056	0.052	0.98	0.72-1.34	0.89507	intronic	#N/A	#N/A
1	HNRNPU	rs11537737	245018909	G	A	0.011	0.011	0.012	1.04	0.55-1.96	0.90612	exonic	synonymous SNV	HNRNPU:NM_004501:exon12:c.C2112T:p.A704A;HNRNPU:NM_031844:exon12:c.C2169T:p.A723A
8	PRKDC	rs8178232	48701786	A	T	0.037	0.037	0.038	1.02	0.72-1.44	0.91663	exonic	unknown	UNKNOWN
8	PRKDC	rs8178107	48794280	T	C	0.037	0.037	0.038	1.02	0.72-1.44	0.92108	intronic	#N/A	#N/A
12	RAPGEF3	rs78244793	48134016	C	T	0.099	0.1	0.098	0.99	0.79-1.24	0.92182	intronic	#N/A	#N/A
1	LAMC2	rs1925043	183207603	T	C	0.34	0.34	0.34	1.01	0.87-1.16	0.92645	intronic	#N/A	#N/A
8	PRKDC	rs7839407	48772414	C	T	0.148	0.147	0.149	1.01	0.84-1.21	0.93759	intronic	#N/A	#N/A
9	NOTCH1	rs3125009	139412884	C	T	0.139	0.139	0.139	1.01	0.83-1.22	0.93766	intronic	#N/A	#N/A
8	PRKDC	rs4873728	48739440	C	A	0.059	0.058	0.059	1.01	0.76-1.35	0.93846	intronic	#N/A	#N/A
1	LAMC2	rs10911285	183187494	T	C	0.337	0.337	0.337	1.01	0.87-1.16	0.93897	intronic	#N/A	#N/A
1	LAMC2	rs1047980	183192304	T	G	0.338	0.339	0.337	1	0.86-1.15	0.94793	exonic	synonymous SNV	LAMC2:NM_005562:exon7:c.T798G:p.G266G;LAMC2:NM_018891:exon7:c.T798G:p.G266G
1	LAMC2	rs2276542	183155399	A	G	0.345	0.343	0.347	1	0.87-1.16	0.95004	UTR5	#N/A	#N/A
1	LAMC2	rs2274981	183184524	C	T	0.337	0.338	0.336	1	0.86-1.15	0.95321	intronic	#N/A	#N/A
9	NOTCH1	rs9411254	139411880	G	A	0.139	0.139	0.138	0.99	0.82-1.21	0.95334	intronic	#N/A	#N/A
6	BRD2	rs2071571;rs556872301	32940621	C	T	0.166	0.167	0.165	0.99	0.83-1.19	0.95549	UTR5	#N/A	#N/A
8	PRKDC	rs6993483	48776189	C	T	0.148	0.148	0.149	1	0.83-1.21	0.95948	intronic	#N/A	#N/A
1	LAMC2	rs1047981	183206573	G	A	0.339	0.339	0.338	1	0.87-1.16	0.98248	exonic	synonymous SNV	LAMC2:NM_005562:exon18:c.G2688A:p.Q896Q;LAMC2:NM_018891:exon18:c.G2688A:p.Q896Q
8	PRKDC	rs8178258	48689366	C	T	0.152	0.152	0.153	1	0.83-1.2	0.98521	intronic	#N/A	#N/A
1	LAMC2	rs1129723	183187603	C	T	0.338	0.339	0.338	1	0.87-1.15	0.98777	exonic	synonymous SNV	LAMC2:NM_005562:exon4:c.C483T:p.V161V;LAMC2:NM_018891:exon4:c.C483T:p.V161V
1	LAMC2	rs539212332	183197531	T	G	0.01	0.01	0.01	1	0.51-1.95	0.99302	exonic	synonymous SNV	LAMC2:NM_005562:exon11:c.T1491G:p.A497A;LAMC2:NM_018891:exon11:c.T1491G:p.A497A
1	LAMC2	rs2296307	183191144	C	T	0.339	0.339	0.338	1	0.87-1.15	0.99491	intronic	#N/A	#N/A
