# Supplementary material for: Evaluation of Rare and Common Variants from Suspected Familial or Sporadic Nasopharyngeal Carcinoma (NPC) Susceptibility Genes in Sporadic NPC
Source: Oxford University Press journal article supplement (doi:10.1158/1055-9965.epi-19-0007), 2019-07-03
Supplement: 10559965epi190007-sup-214687_3_supp_5587551_pt3lfc.xlsx [file 10559965epi190007-sup-214687_3_supp_5587551_pt3lfc.xlsx]

## Sheet: Sheet1
Supplementary Table 4. Genes associated with nasopharyngeal carcinoma (NPC) in Taiwan identified by SKAT gene-based tests among incident NPC cases and controls.
Chr.	Gene	Cytoband	Common and rare variants combined			Common variants			Rare variants
						(MAF ≥1%)			(MAF <1%)
			N. of variants	P SKAT-C a		N. of variants	P SKAT-C a		N. of variants	P SKAT-O a
Gene previously identified from a study of multiplex families and a meta-analysis of NPC GWAS
5	CLPTM1L/TERT	5p15.33	155	0.0054		14	0.003		141	0.68
Gene previously identified from a study of multiplex families
6	BRD2	6p21.32	74	0.078		20	0.022		54	0.66
1	HNRNPU	1q44	41	0.0052		6	0.32		35	0.0016
8	PRKDC	8q11.21	233	0.036		17	0.086		216	0.15
4	NIPAL1	4p12	23	0.4		0	N/A		23	0.52
7	LFNG	7p22.3	76	0.34		8	0.62		68	0.031
19	BCL2L12	19q13.33	26	0.45		1	0.48		25	0.51
5	MAML1	5q35.3	32	0.36		3	0.18		29	0.78
12	RAPGEF3	12q13.11	93	0.083		17	0.19		76	0.18
3	MLH1	3p22.2	59	0.13		9	0.13		50	0.28
22	MFNG	22q13.1	31	0.6		2	0.55		29	0.45
19	DLL3	19q13.2	36	0.43		4	0.1		32	0.27
9	NOTCH1	9q34.3	246	0.89		20	0.68		226	0.63
2	ITGB6	2q24.2	61	0.5		7	0.95		54	0.33
1	PSEN2	1q42.13	48	0.39		6	0.23		42	0.32
1	LAMC2	1q25.3	95	0.45		26	0.38		69	0.51
18	NEDD4L	18q21.31	92	0.58		9	0.64		83	0.64
Gene previously identified from a meta-analysis of NPC GWAS
9	CDKN2A/2B	9p21.3	30	4e-05		6	0.00011		24	0.085
13	TNFRSF19	13q12.12	33	0.2		8	0.071		25	0.47
3	MECOM	3q26.2	63	0.11		5	0.049		58	0.77
Abbreviation: Chr: Chromosome; GWAS: genome-wide association study; MAF: minor allele frequency; SKAT: Sequence Kernel Association test; SKAT-C: Sequence Kernel Association combined sum test; SKAT-O: Sequence Kernel Association test with optimal adjustment (burden test).
a All models were adjusted for study, sex and age group (in 10-year category).
