# Supplementary material for: Evaluation of Rare and Common Variants from Suspected Familial or Sporadic Nasopharyngeal Carcinoma (NPC) Susceptibility Genes in Sporadic NPC
Source: Oxford University Press journal article supplement (doi:10.1158/1055-9965.epi-19-0007), 2019-07-03
Supplement: 10559965epi190007-sup-214687_3_supp_5587552_pt3l6c.xlsx [file 10559965epi190007-sup-214687_3_supp_5587552_pt3l6c.xlsx]

## Sheet: Sheet1
Supplementary Table 5. Selected results from associations of common variants (MAF ≥1%) with nasopharyngeal carcinoma (NPC) risk in Taiwan among incident cases and controls.
SNP	Gene	Chr	Position (bp)	REF	EFFECT	MAF a	MAF		OR per allele a	P
							Control	Case	(95% CI)
Gene previously identified from a study of multiplex families b
rs78231671	PRKDC	8	48695175	T	C	0.037	0.026	0.054	2.17 (1.46-3.24)	0.00015
rs76146382	BRD2	6	32943229	T	C	0.069	0.058	0.087	1.48 (1.12-1.97)	0.0066
Gene previously identified from a pooled analysis of NPC GWAS c
rs31489	CLPTM1L/TERT	5	1342714	C	A	0.163	0.177	0.14	0.77 (0.62-0.95)	0.015
rs1412829	CDKN2A/2B	9	22043926	A	G	0.089	0.105	0.06	0.55 (0.41-0.73)	5e-05
rs9510787	TNFRSF19	13	24205195	A	G	0.316	0.304	0.336	1.16 (0.99-1.36)	0.067
rs6774494	MECOM	3	169082633	G	A	0.392	0.403	0.373	0.88 (0.75-1.03)	0.11
Abbreviation: Chr: Chromosome; EFFECT: effect allele; GWAS: genome-wide association study; MAF: minor allele frequency; OR: odds ratio; REF: reference allele
a All models were adjusted for study, sex, and age group (in 10-year category).
b Ref: #5
c Selected based on results from a pooled analysis (ref: #6)
